# Supplementary material
Source: PubMed Central journal article supplement (PMC4114057)
Supplement: supp_2.2.E102_2013-0025-1-at.pdf [file supp_2.2.E102_2013-0025-1-at.pdf]

## Appendix A: Surgical and Diagnostic Codes

| <b>Table A1: Breast Cancer as Diagnosis Type (Most Responsible) and Procedure</b> |                                                                                                                                                                                                                        |
|-----------------------------------------------------------------------------------|------------------------------------------------------------------------------------------------------------------------------------------------------------------------------------------------------------------------|
| <b>Diagnostic codes</b>                                                           | <b>ICD-10-CA</b>                                                                                                                                                                                                       |
| <b>Invasive Breast Cancer</b>                                                     | C50.00, C50.01, C50.09, C50.10, C50.11, C50.19, C50.20, C50.21, C50.29, C50.30, C50.31, C50.39, C50.40, C50.41, C50.49, C50.50, C50.51, C50.59, C50.60, C50.61, C50.69, C50.80, C50.81, C50.89, C50.90, C50.91, C50.99 |
| <b>Procedure codes</b>                                                            | <b>ICD-10-CA</b>                                                                                                                                                                                                       |
| <b>Mastectomy</b>                                                                 | 1.YM.89–1.YM.92                                                                                                                                                                                                        |
| <b>Breast-Conserving Surgery</b>                                                  | 1.YM.87, 1.YM.88                                                                                                                                                                                                       |

| <b>Table A2: Prophylactic Mastectomy</b> |                  |                                 |
|------------------------------------------|------------------|---------------------------------|
|                                          | <b>ICD-10-CA</b> | <b>Note</b>                     |
|                                          | Z40.00           | Flag Z85.3 (coding is optional) |

| <b>Table A3: Reconstruction</b> |                                                   |                                 |
|---------------------------------|---------------------------------------------------|---------------------------------|
|                                 | <b>ICD-10-CA</b>                                  | <b>Note</b>                     |
| <b>Immediate (if Index)</b>     | [1.YM.88, 1.YM.90, 1.YM.92]                       |                                 |
| <b>Delayed (if Not Index)</b>   | Z42.1<br><b>or</b><br>[1.YM.88, 1.YM.90, 1.YM.92] | Flag Z85.3 (coding is optional) |
